# Supplementary material
Source: PubMed Central journal article supplement (PMC7189099)

## SUPPLEMENTAL

### Supplemental Figure Legends

**Figure S1. Loss of CPT2 results in no gross anatomical differences.** A) Volumes of brain regions based on MRI data using CPT2<sup>lox/lox</sup> (n = 3) and CPT2<sup>B-/-</sup> (n = 4) mice. 1. lateral ventricles 2. cortex 3. hippocampus, and 4. cerebellum. Data are expressed as mean  $\pm$  S.E.M. B) Fractional anisotropy from a representative CPT2<sup>lox/lox</sup> and CPT2<sup>B-/-</sup> mouse. C) *Cpt2* mRNA abundance across tissues using CPT2<sup>lox/lox</sup> (n = 6) and CPT2<sup>B-/-</sup> mice (n = 6). D) wet tissue weight across tissues as a percentage of body weight using CPT2<sup>lox/lox</sup> (n = 5) and CPT2<sup>B-/-</sup> (n = 6). Represented data analyzed using student's two-tailed t-tests. \* $\alpha$  = 0.05; \*\* $\alpha$  = 0.01; \*\*\* $\alpha$  = 0.001; ns, not significant.

**Figure S2. Nestin-Cre does not have any impact on anxiety.** *3-Zone Open Field Test* using adult CPT2<sup>lox/+</sup> (n = 12) and Nestin-Cre;CPT2<sup>lox/+</sup> (n = 5) mice. A) Distances traveled in outer, middle, and center zones. B) Number of entries in outer, middle, and center zones. C) Total time spent in outer, middle, and center zones. D) Total distance traveled. E) Mean velocity. F) Total number of mobile episodes. G) Total number of immobile episodes. H) Total time spent mobile. I) Total time spent immobile. J) Grooming time. K) Time rearing. Represented data analyzed using student's two-tailed t-tests. Data are expressed as mean  $\pm$  S.E.M \* $\alpha$  = 0.05; \*\* $\alpha$  = 0.01; \*\*\* $\alpha$  = 0.001; \*\*\*\* $\alpha$  = 0.0001; ns, not significant.

**Figure S3. Loss of brain-specific long-chain fatty acid oxidation results in a mild increase in anxiety-like behavior and a potential minor cognitive deficit.** *3-Zone Open Field Test* A) Total percentage of time spent in the inner, middle, and outer zones by adult female CPT2<sup>lox/lox</sup> and CPT2<sup>B-/-</sup> mice (n = 10). B) Average velocity of adult female CPT2<sup>lox/lox</sup> and CPT2<sup>B-/-</sup> mice

while in inner middle and outer zones (n = 10). Represented data analyzed using student's two-tailed t-tests. Data are expressed as mean  $\pm$  S.E.M \* $\alpha$  = 0.05; \*\* $\alpha$  = 0.01; \*\*\* $\alpha$  = 0.001; \*\*\*\* $\alpha$  = 0.0001; ns, not significant.

**Figure S4. Deletion of *Cpt2* in brain does not impact TCA or glycolytic metabolites.**

Fold changes and relative abundances of A) TCA and B) glycolytic metabolites in whole hippocampus from 24-hour fasted 9-week old CPT2<sup>B-/-</sup>, CPT2<sup>L-/-</sup>, and PPAR $\alpha$ <sup>-/-</sup> in comparison and normalized to CPT2<sup>lox/lox</sup> (n = 6). Statistical significance of represented metabolites determined using two-stage false discovery rate (FDR) method of Benjamini, Krieger, and Yekutieli with a FDR (Q) of 10%. Fold changes in green boxes are significantly increased, fold changes in red boxes are significantly decreased, and fold changes in yellow boxes are not significantly affected by genotype. The same data are represented as mean of relative species abundance  $\pm$  S.E.M. in adjacent graphs. \* $\alpha$  = 0.05; \*\* $\alpha$  = 0.01; \*\*\* $\alpha$  = 0.001; \*\*\*\* $\alpha$  = 0.0001; ns, not significant.

**Figure S5. Diet does not significantly impact steady-state long-chain acylcarnitines in**

**CPT2<sup>B-/-</sup> brain.** A-D) Concentrations of steady-state acylcarnitines were determined using approximately 25mg of cortex from 9-week old fed and 24-hour fasted CPT2<sup>lox/lox</sup> and CPT2<sup>B-/-</sup> mice (n = 6). Additionally, steady-state acylcarnitines were determined using approximately 25mg of cortex from 18-week old CPT2<sup>lox/lox</sup> and CPT2<sup>B-/-</sup> mice after 15-weeks on low-fat or high-fat diet (n = 6). E) Select acylcarnitines from media collected from cultured P2 cortical astrocytes from CPT2<sup>lox/lox</sup> and CPT2<sup>B-/-</sup> mice. Astrocytes were incubated overnight in 100 $\mu$ M

oleate media. Data are expressed as mean  $\pm$  S.E.M. Represented data analyzed using ordinary two-way analysis of variance with Sidak's tests for multiple comparisons. \* $\alpha$  = 0.05; \*\* $\alpha$  = 0.01; \*\*\* $\alpha$  = 0.001; \*\*\*\* $\alpha$  = 0.0001; ns, not significant.

**Table S1. qRT-PCR primers**

**Table S2 unbiased and targeted metabolomics data**

All data from unbiased 24-hour fasted hippocampus metabolome (sheet 1), cortical acylcarnitines from mice under different dietary states (sheet 2), and arterial and venous acylcarnitines (sheet 3).

S1

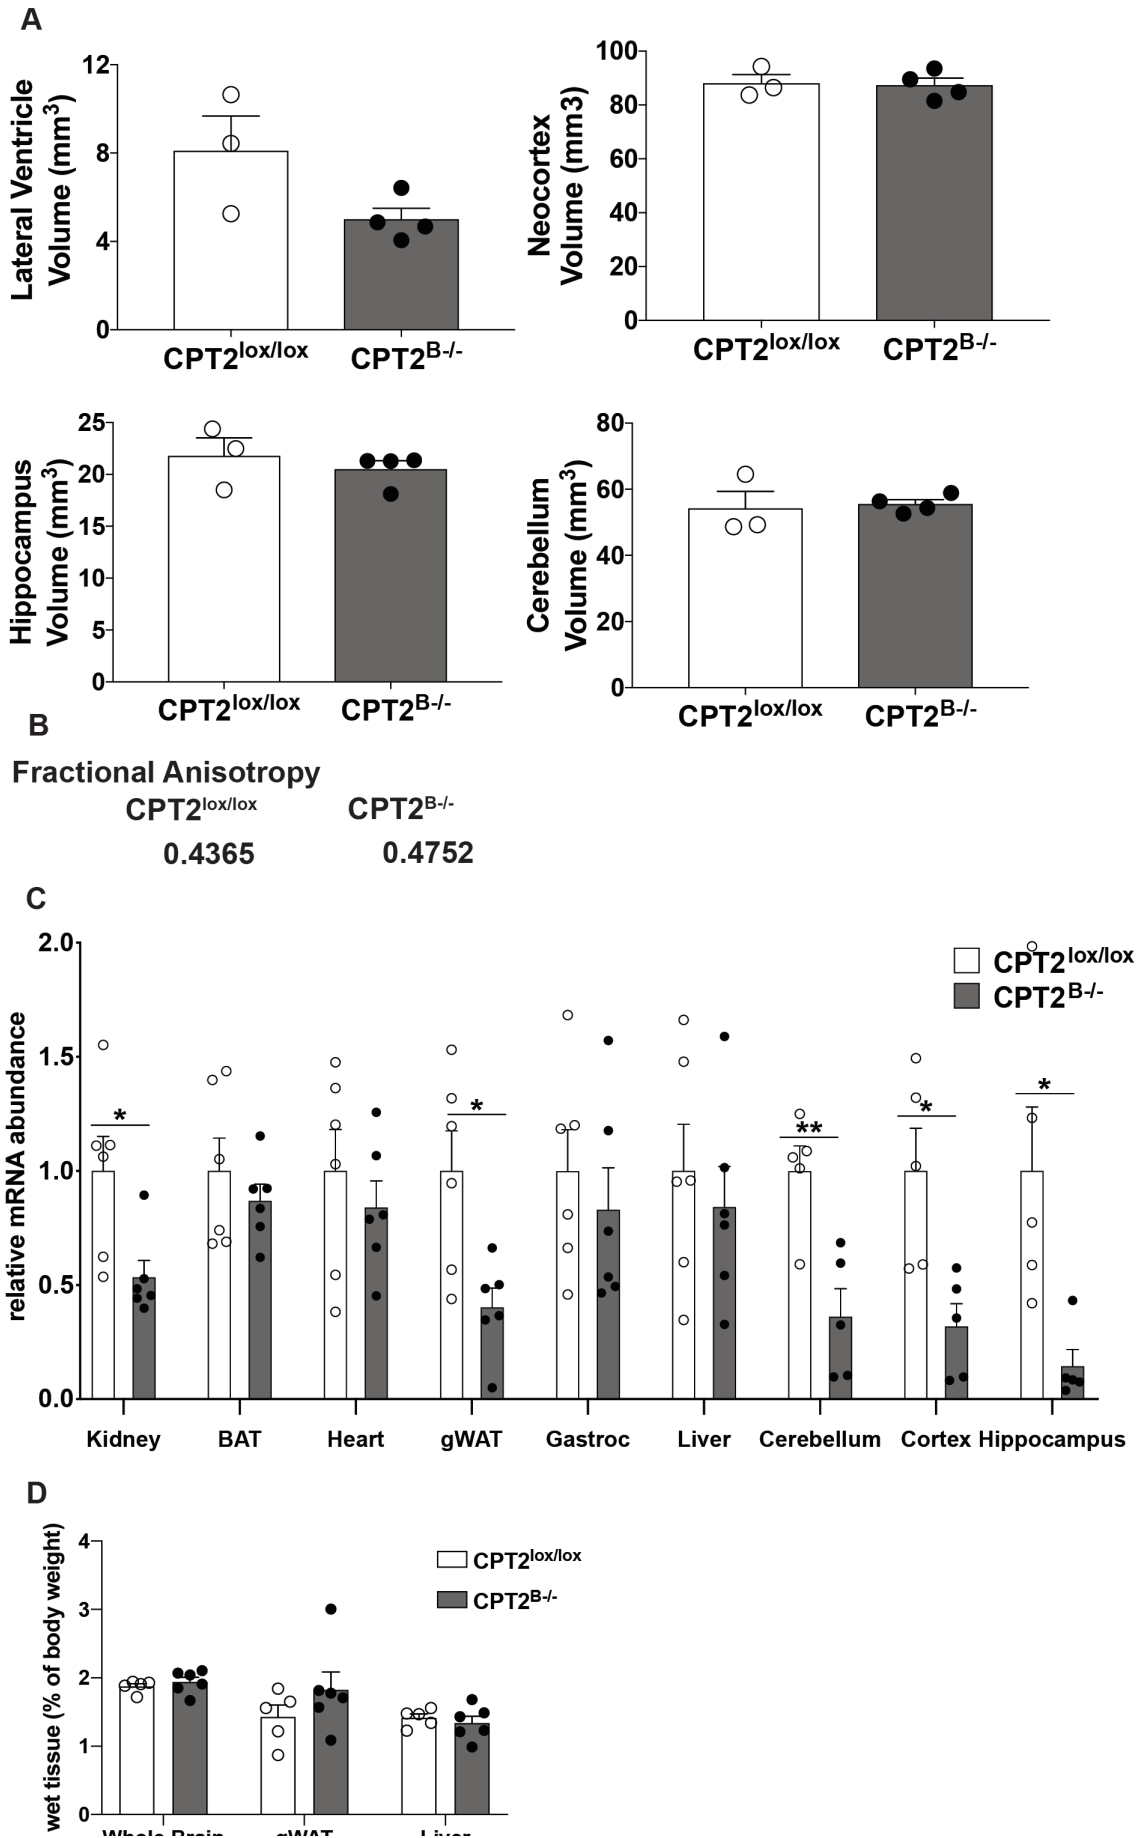

S2

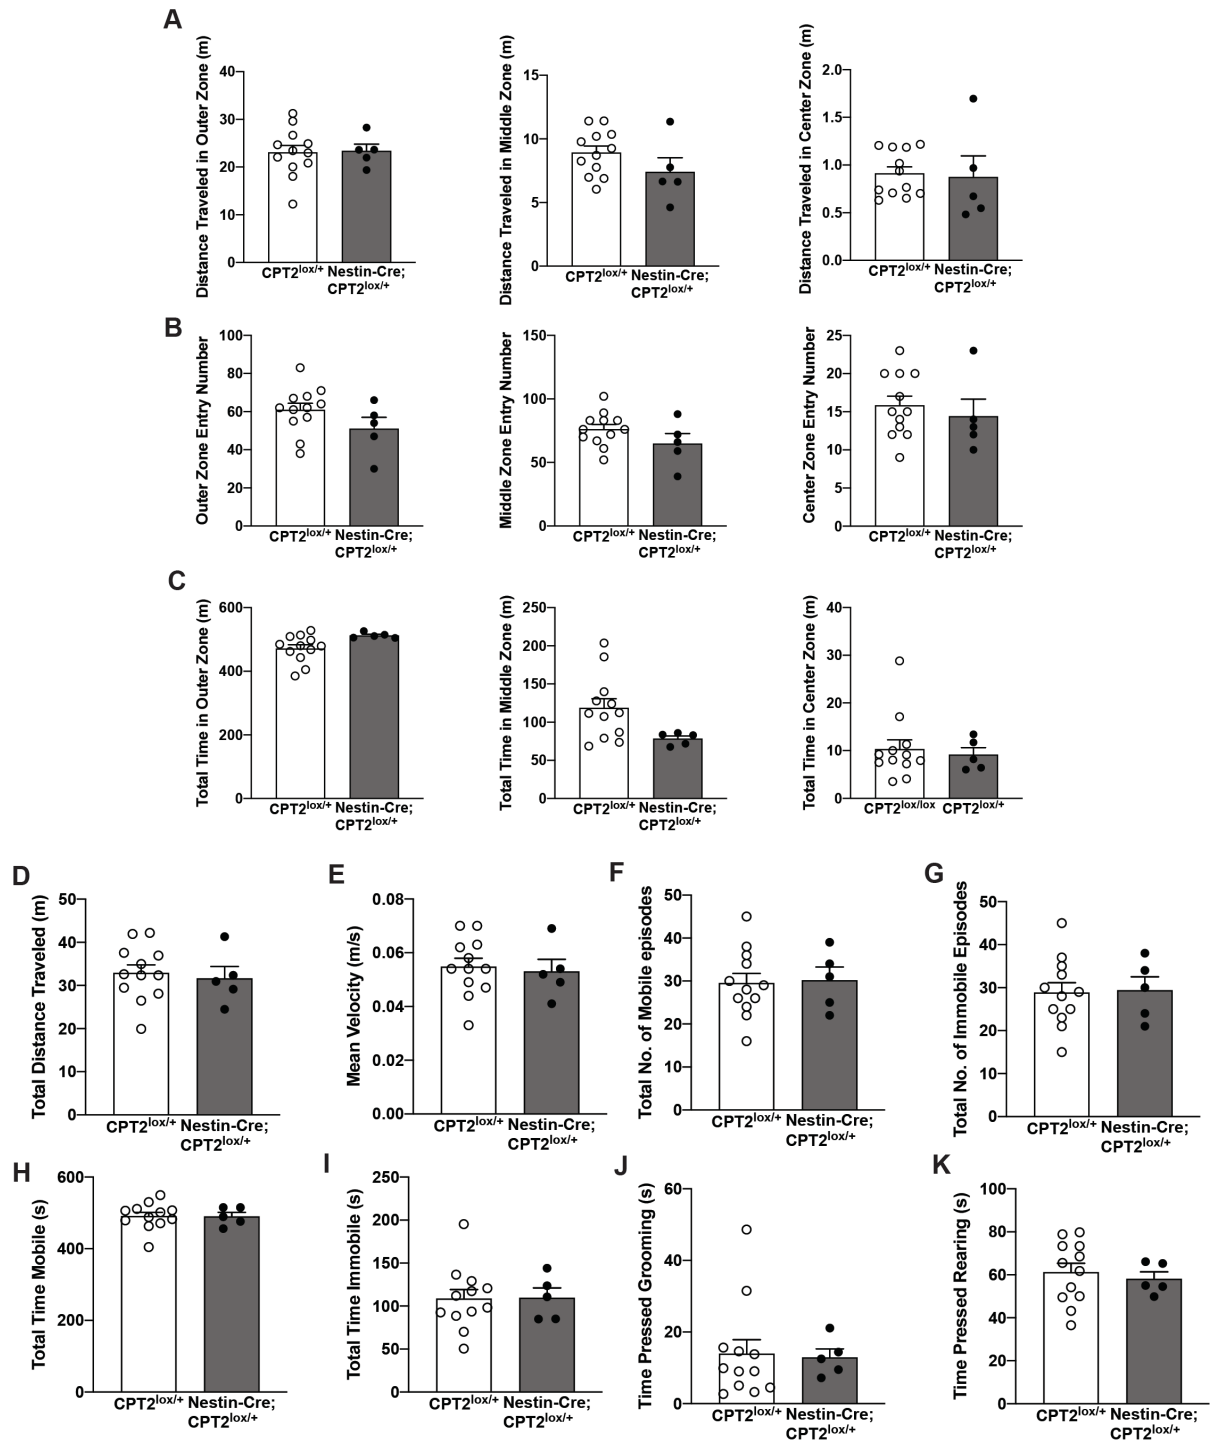

S3

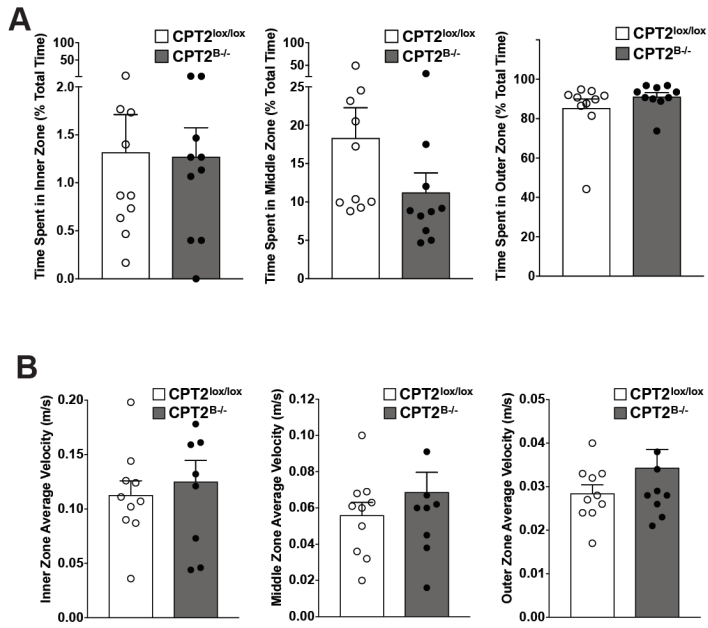

# S4

**A**

**TCA Intermediates (Fold Change to CPT2<sup>lox/lox</sup>)**

| Species             | CPT2 <sup>B-/-</sup> | CPT2 <sup>L-/-</sup> | PPAR $\alpha$ <sup>-/-</sup> |
|---------------------|----------------------|----------------------|------------------------------|
| acetyl-CoA          | 1.798                | 1.007                | 1.847                        |
| alpha-ketoglutarate | 1.107                | 1.094                | 0.958                        |
| citrate             | 1.055                | 0.980                | 0.993                        |
| fumarate            | 0.974                | 1.048                | 0.796                        |
| malate              | 0.982                | 1.024                | 0.837                        |
| succinate           | 1.494                | 1.250                | 1.640                        |

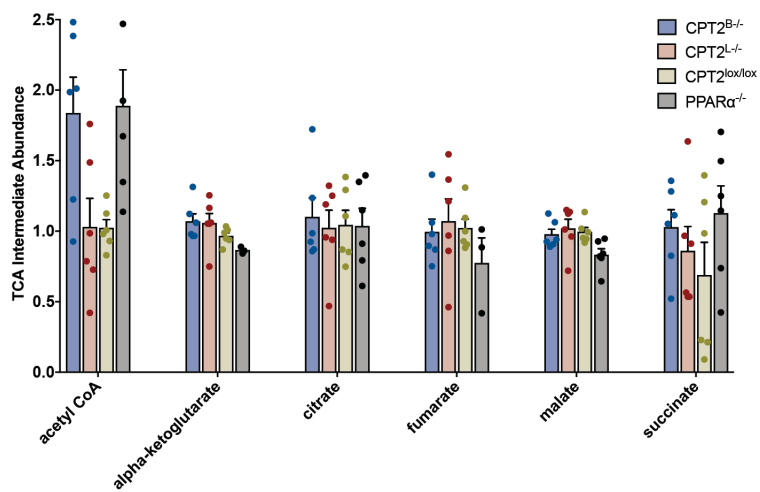

**B**

**Glycolysis (Fold Change to CPT2<sup>lox/lox</sup>)**

| Species                    | CPT2 <sup>B-/-</sup> | CPT2 <sup>L-/-</sup> | PPAR $\alpha$ <sup>-/-</sup> |
|----------------------------|----------------------|----------------------|------------------------------|
| 3-phosphoglycerate         | 1.038                | 1.424                | 1.217                        |
| dihydroxyacetone phosphate | 0.713                | 1.075                | 0.757                        |
| fructose 1,6 biphosphate   | 0.678                | 0.865                | 0.877                        |
| glucose                    | 1.061                | 0.910                | 1.097                        |
| glucose-6-phosphate        | 0.716                | 1.076                | 0.761                        |
| phosphoenolpyruvate        | 1.218                | 1.578                | 1.422                        |
| pyruvate                   | 1.109                | 1.003                | 0.783                        |

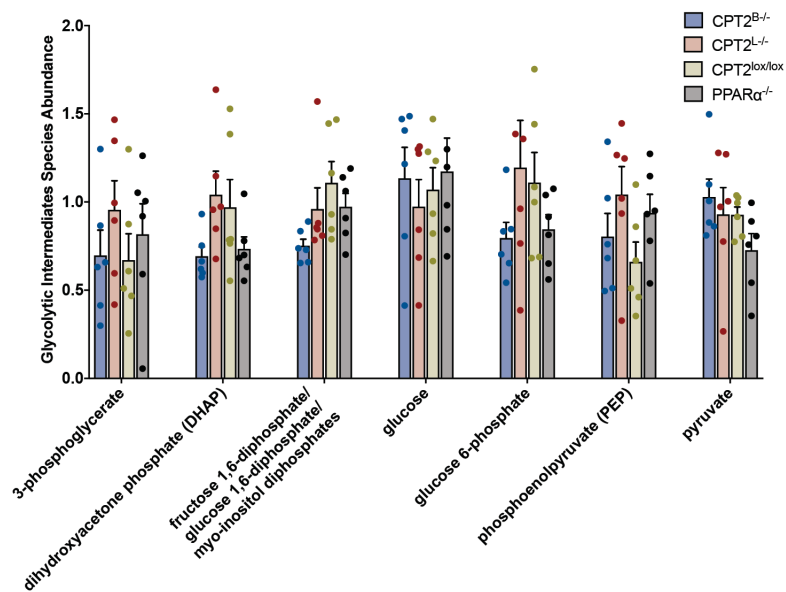

S5

A

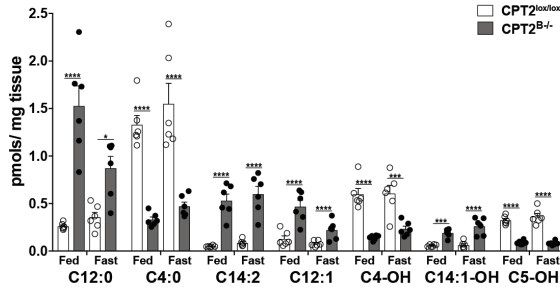

C

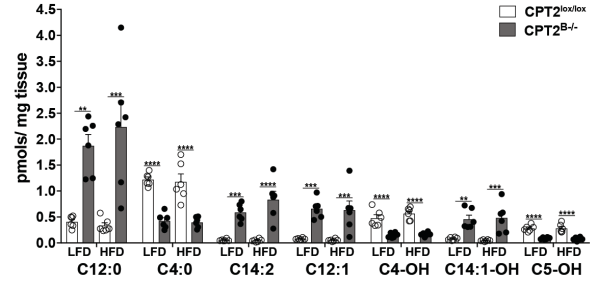

B

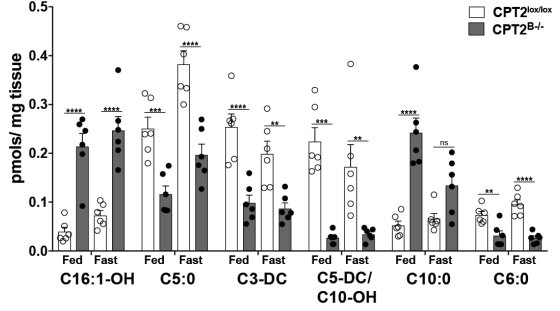

D

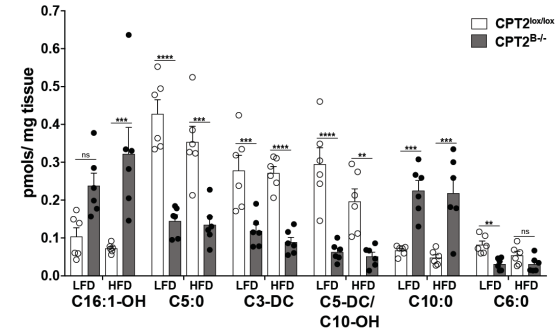

E

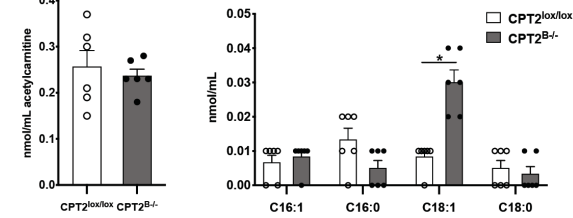

Supplement: MCB.00037-20-s0001.pdf [file MCB.00037-20-s0001.pdf]
